# Supplementary material for: Integrating Experiential Education into Pharmacy Curriculum in a Public Pharmacy School in Sudan
Source: Research Square preprint supplement (doi:10.21203/rs.3.rs-5311699/v1), 2025-10-31
Supplement: Supplementary file 1 [file 201853ae8e58e2dca726dc35.docx]

##

## ACCREDITATION OF DOMAIN THREE:

THE EDUCATIONAL PROGRAMME STANDARDS FOR EXPERIENTIAL EDUCATION

**III. Standard three curricular design, delivery, and oversight:**

The curriculum must be designed, delivered, and monitored by faculty to ensure depth and breadth of requisite knowledge and skills, development of professional attitudes and

behaviors, and the opportunity to explore professional areas of interest. Curricular expectations must emphasize active learning pedagogy (methods & practice of learning), content integration, knowledge acquisition, application of knowledge to therapeutic decision-making, and the maturation of professional attitudes and behaviors. The key elements of this standard include the following:

Basic standards. The school MUST:

3.1 Define the curricular model stating the instructional and learning methods

3.2 Ensure that the professional curriculum has a minimum of five academic years or the equivalent number of hours or credits. (Program duration)

3.3 Ensure that the body charged with curricular oversight (e.g. Curriculum Committee):

3.3.1 Is representative of the faculty at large,

3.3.2 Includes student representation,

3.3.3 Formally liaises with the body charged with curricular assessment (e.g., Assessment Committee), and

3.3.4 Is adequately resourced to assure and continually advance curricular quality.

3.4 Ensure that the curriculum is organized to allow for the logical building of a sound scientific and clinical knowledge base that eventually enables the learners to apply knowledge to practice. (Knowledge application).

3.5 Ensure that the curriculum is rigorous, contemporary, and intentionally sequenced to

promote integration and reinforcement of content. (Curricular structure).

3.6 Ensure that the curriculum demonstrates competency in skills required to achieve the educational outcomes.

3.7 Ensure that the didactic curriculum is delivered via teaching/learning methods that:

3.7 Ensure that the didactic curriculum is delivered via teaching/learning methods that:

3.7.1 Facilitate achievement of learning outcomes,

3.7.2 Actively engage learners,

3.7.3 Promote student responsibility for learning, and

3.7.4 Foster collaborative learning.

3.8 Ensure that the didactic and experiential education courses are codified in faculty-­‐approved syllabi that describe the nature and extent of:

3.8.1 Expected learning outcomes,

3.8.2 The methods by which achievement of those outcomes will be assessed.

Quality development standards. The school SHOULD:

3.9 Ensure that the didactic and experiential education courses are codified in faculty-­‐approved syllabi that describe the nature and extent of:

3.9.1 Inter-­‐professional interactions, and

3.9.2 Direct patient care (if applicable). (Course syllabi)

3.10 Experiential quality assurance: A quality assurance procedure for all pharmacy practice experiences must be established and implemented to:

1. Facilitate achievement of stated course expectations,

2. Standardize key components of experiences across all sites offering the same experiential course, and

3. Promote consistency of student performance assessment.

**V. Standard five - Pharmacy Practice Experience (PPE) curriculum**

The PPE curriculum must provide a rigorous foundation in the biomedical, pharmaceutical, social/administrative/behavioral and clinical sciences and incorporate Introductory Pharmacy Practice Experience (IPPE) in order to prepare students for Pharmacy Practice Experience. Introductory Practice Experience: Early experience exposure to the practice of pharmacy outside the walls of the college of pharmacy. The key elements of this standard include the following:

Basic standards. The school MUST:

5.1 Ensure that the didactic portion of the PPE curriculum includes rigorous instruction in all sciences that define the profession. Appropriate breadth and depth of instruction in these sciences must be documented regardless of curricular model employed (e.g. blocked, integrated, traditional ‘stand-­‐alone’ course structure, etc.). (Didactic curriculum).

5.2 Ensure that the PPE curriculum allows for the development and maturation of the

knowledge, skills, abilities, attitudes, and behaviors that underpin (support) the educational outcomes. (Development and maturation)

5.3 Ensure that the PPE curriculum develops the student’s evidence-­‐based clinical reasoning skills and the ability to apply them across the patient’s lifespan. (Evidence-­‐based clinical reasoning)

Quality development standards. The school SHOULD:

5.4 Ensure that the Introductory Pharmacy Practice Experience (IPPE) exposes students to common contemporary practice models, professional ethics and expected behaviors, and direct patient care activities. IPPE should be structured and sequenced so as to intentionally develop in students a clear understanding of what constitutes good pharmacy practice prior to beginning APPE. (IPPE expectations).

5.5 Ensure that the IPPE total from 120 -­‐ 210 contact hours of experience and should be purposefully threaded throughout the didactic curriculum. A minimum 90 contact hours must be balanced between community and institutional health-­‐system settings. (IPPE duration).

5.6 Ensure that simulated practice experiences are used to mimic actual or realistic pharmacist-delivered patient care situations. However, simulation hours should not substitute for the required time in community and institutional health-­‐system settings. (Simulation for IPPE).

**VI. Standard (VI) Advanced Pharmacy Practice Experience (APPE) curriculum**

Advanced Practice Experience is defined as the experiential education for students building on previous IPPE and didactic courses to establish practitioners and expose students to the wide world of practice. A continuum of APPE must be of the scope, intensity, and duration required to support the achievement of the educational outcomes to prepare practice-ready graduates. APPE must integrate, apply, reinforce, and advance the knowledge, skills, attitudes, abilities, and behaviors developed in the PPE curriculum and in co-­‐curricular activities. The key elements of this standard include the following:

Quality development standards. The school SHOULD:

6.1 Ensure that APPE emphasizes continuity of care and incorporates acute, chronic, and wellness-promoting patient care services in ambulatory and inpatient/health-system settings. Students should gain in-­‐depth experience in patient-­‐centered collaborative care. Students should be able to collect and assess patient data, develop, implement, interpret, and evaluate care plans, and provide ongoing, coordinated, or transitional care services, as appropriate. (Patient care emphasis)

6.2 Ensure that APPE exposes students to diverse patient populations as related to age, gender, race/ethnicity, geographic location, and disease state(s). (Diverse populations)

6.3 Ensure that students gain in-­‐depth experience in delivering direct patient care as part of an inter-professional team. (Inter-professional experiences).

6.4 Ensure that APPE follows successful completion of all IPPE and required didactic curricular content.

6.5 Ensure that the curriculum includes no less than 36 weeks of APPE.

6.6 Ensure that APPE is balanced between three key areas: community/ambulatory care, hospital/health system. APPE in community/ambulatory care and in hospital/health system care should each be a minimum of 10 weeks. APPE must focus on direct patient care, systems management and medication distribution and emphasize inter-­‐professional team-based care delivery to diverse patient populations. (Required APPE).
