# Supplementary material for: Integrating Experiential Education into Pharmacy Curriculum in a Public Pharmacy School in Sudan
Source: Research Square preprint supplement (doi:10.21203/rs.3.rs-5311699/v1), 2025-10-31
Supplement: Supplementary file 3 [file f4d8e967bc498e832c9c1aa0.docx]

Subject: Request for Waiver of Publication Fees

Dear BMC Medical Journal

I hope this message finds you well. I am writing to kindly request a waiver of the publication charges for my article, titled “[Insert Article Title],” Integrating Experiential Education into Pharmacy Curriculum in a Public Pharmacy School in Sudan’’

I am from Sudan, a country severely affected by war and economic challenges. Due to the ongoing conflict and its impact on financial resources, I have hardship financial situation, and it is difficult for me to meet the publication fees at this time.

I truly believe that the findings and insights in my article are of great value to the scientific community, and I would be deeply grateful if you could consider my request for a full or partial waiver.

My research is entitled: Integrating Experiential Education into Pharmacy Curriculum in a Public Pharmacy School in Sudan

I knew from your website that my country Sudan is listed among others who are entitled a discount, but our situation now is more complicated.

I have been displaced to Egypt because of the current conflict.

Thank you for your understanding and support. I look forward to your positive response.

Sincerely,

Randa Alsadig Almahdi

University of Science and Technology- Sudan

Cellular phone: +201115957378
